# Supplementary material for: Tailored activity of Cu–Fe bimetallic Beta zeolite with promising C3H6resistance for NH3-SCR
Source: Royal Society of Chemistry journal article supplement (doi:10.1039/d0cy01631d), 2020-10-27
Supplement: d0cy01631d1.pdf [file d0cy01631d1.pdf]

## Supporting Information

### **Tailored activity of Cu-Fe Bimetallic Beta zeolite with promising C<sub>3</sub>H<sub>6</sub> resistance for NH<sub>3</sub>-SCR**

Qi Zhao, Bingbing Chen, Bolin Zou, Limei Yu, Chuan Shi\*

*State Key Laboratory of Fine Chemicals, School of Chemistry Engineering, Dalian*

*University of Technology, Dalian 116024, China*

\* Corresponding author. Tel.: +86 411 84986083;

*E-mail address:* [chuanshi@dlut.edu.cn](mailto:chuanshi@dlut.edu.cn) (Chuan Shi).

Table S1 The amount of NH<sub>3</sub> in TPD experiments at different temperature region

| Reaction process                                           | Species         | The amount of species (mmol/g <sub>cat</sub> ) |            |          |
|------------------------------------------------------------|-----------------|------------------------------------------------|------------|----------|
|                                                            |                 | < 200 °C                                       | 200-400 °C | > 400 °C |
| NH <sub>3</sub> -adsorption                                | NH <sub>3</sub> | 1.31                                           | 1.21       | 0.15     |
| NH <sub>3</sub> +C <sub>3</sub> H <sub>6</sub> -adsorption | NH <sub>3</sub> | 1.46                                           | 0.97       | 0.40     |

Table S2 The amount of NO in TPD experiments at different temperature region

| Reaction process                                             | Species | The amount of species (mmol/g <sub>cat</sub> ) |            |          |
|--------------------------------------------------------------|---------|------------------------------------------------|------------|----------|
|                                                              |         | < 100 °C                                       | 100-200 °C | > 200 °C |
| NO+O <sub>2</sub> -adsorption                                | NO      | 0.037                                          | 0.10       | 0.12     |
| NO+O <sub>2</sub> +C <sub>3</sub> H <sub>6</sub> -adsorption | NO      | 0.015                                          | 0.22       | 0.015    |

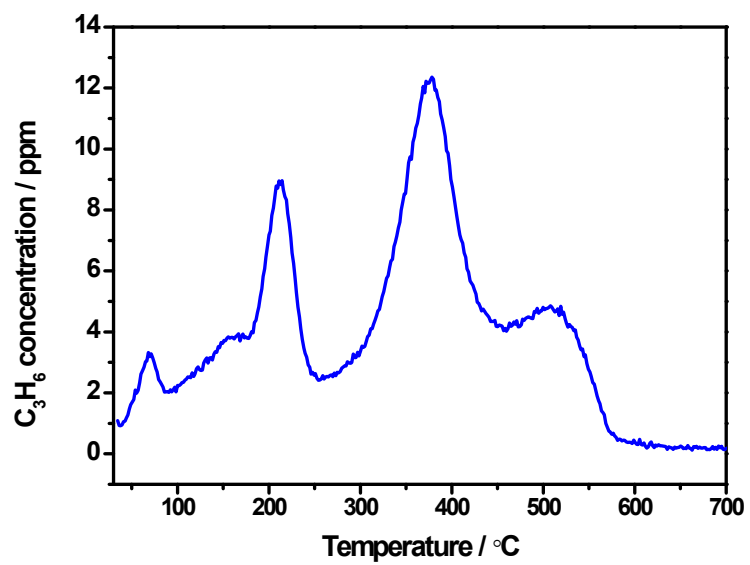

Fig. S1 TPD profiles for Cu<sub>6.8</sub>-Fe-Beta exposure to 500 ppm NH<sub>3</sub>/500 ppm C<sub>3</sub>H<sub>6</sub>/Ar at RT followed by heating in a flow of Ar at 10 °C/min.

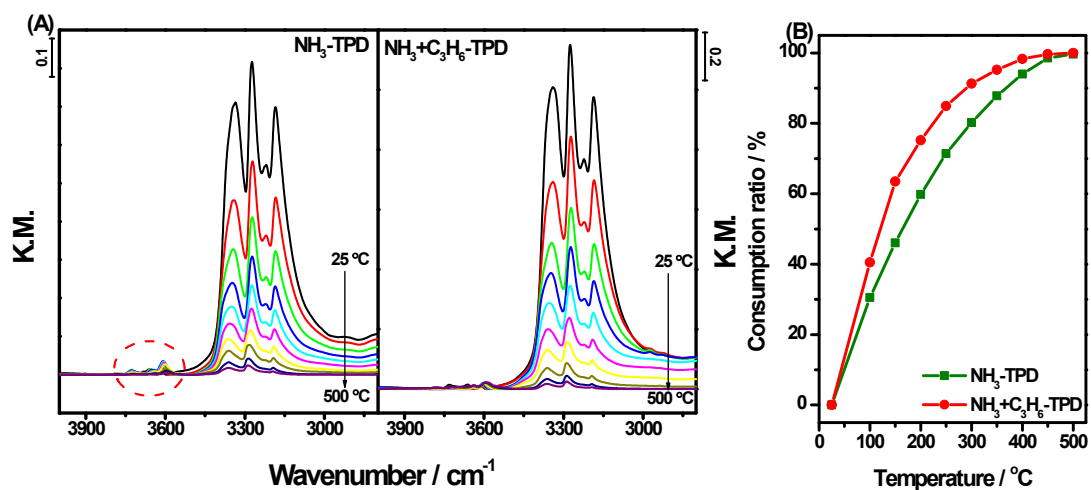

Fig. S2 IR spectra at high wavenumber of Cu<sub>6.8</sub>-Fe-Beta (A) and the consumption rate of peak at 1630 cm<sup>-1</sup> (B) after exposure to 500 ppm NH<sub>3</sub>/He or 500 ppm NH<sub>3</sub>/500 ppm C<sub>3</sub>H<sub>6</sub>/He at 25 °C followed by temperature raising to 500 °C in He.

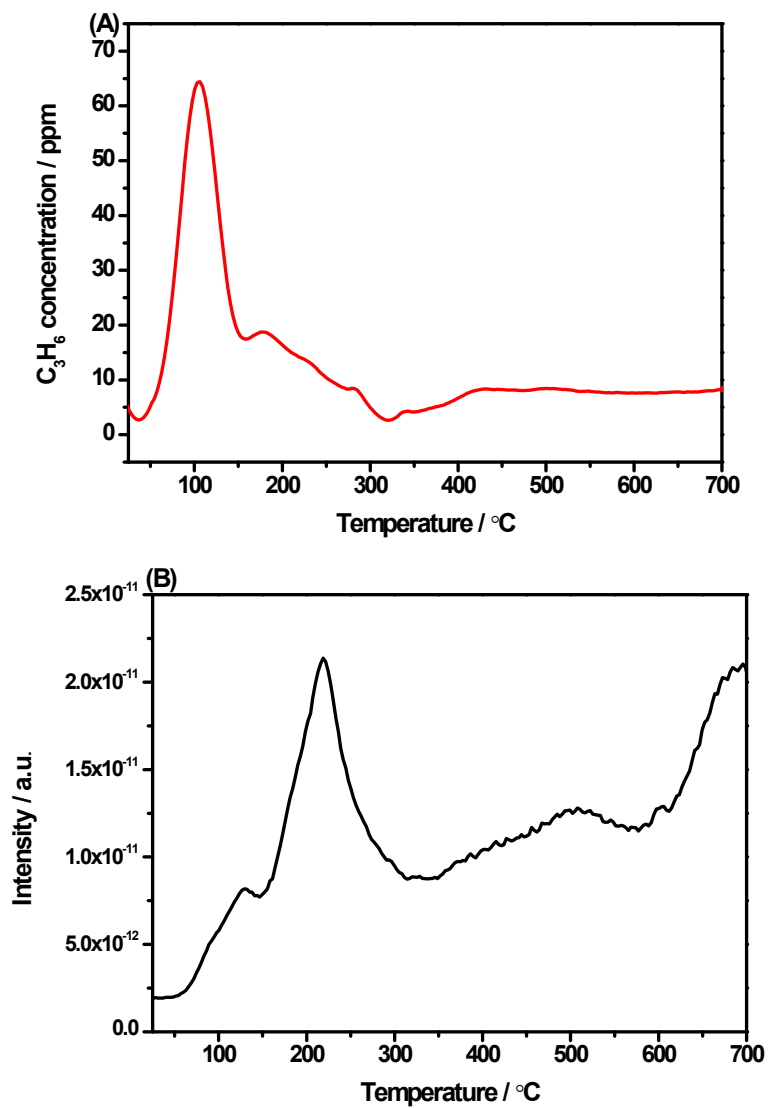

Fig. S3  $C_3H_6$  (A) and  $CO_2$  (B) signal in TPD profiles for  $Cu_{6.8}$ -Fe-Beta exposure to 500 ppm  $NO/10\% O_2/500$  ppm  $C_3H_6/Ar$  at RT followed by heating in a flow of Ar at 10  $^{\circ}C/min$ .

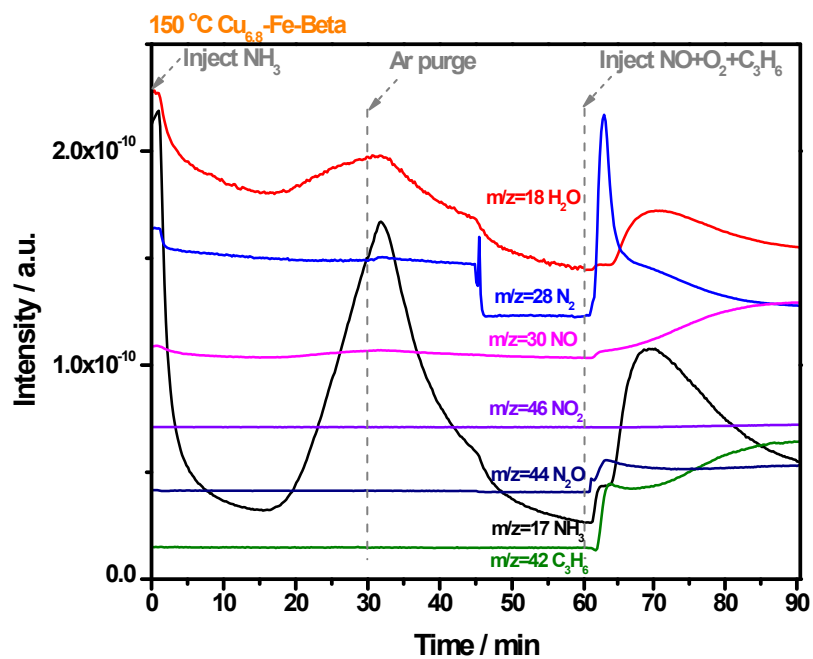

Fig. S4 MS data for Cu<sub>6.8</sub>-Fe-Beta treated by 500 ppm NH<sub>3</sub>/Ar followed by exposure to 500 ppm C<sub>3</sub>H<sub>6</sub>/500 ppm NO/10% O<sub>2</sub>/Ar at 150 °C for various times.

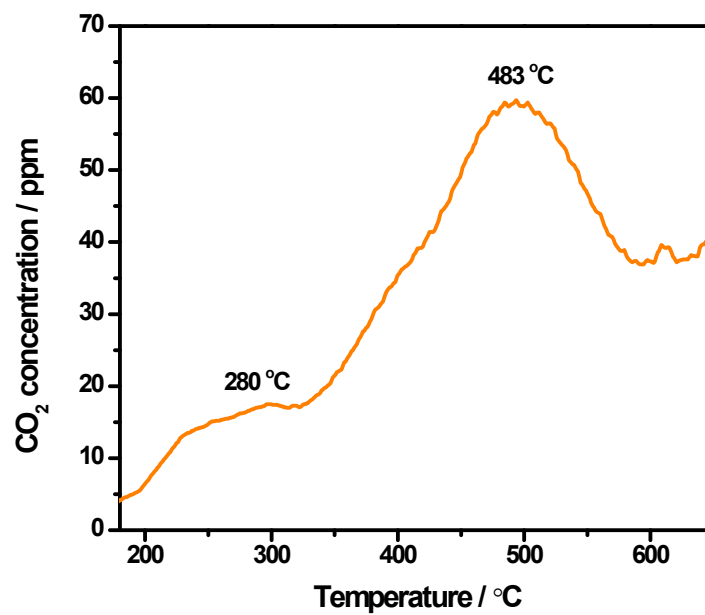

Fig. S5 CO<sub>2</sub> concentration during temperature raising from 150 to 650 °C in Ar for Cu<sub>6.8</sub>-Fe-Beta pretreated by exposure to 500 ppm NH<sub>3</sub>/Ar followed by exposure to 500 ppm C<sub>3</sub>H<sub>6</sub>/500 ppm NO/10% O<sub>2</sub>/Ar at 150 °C.



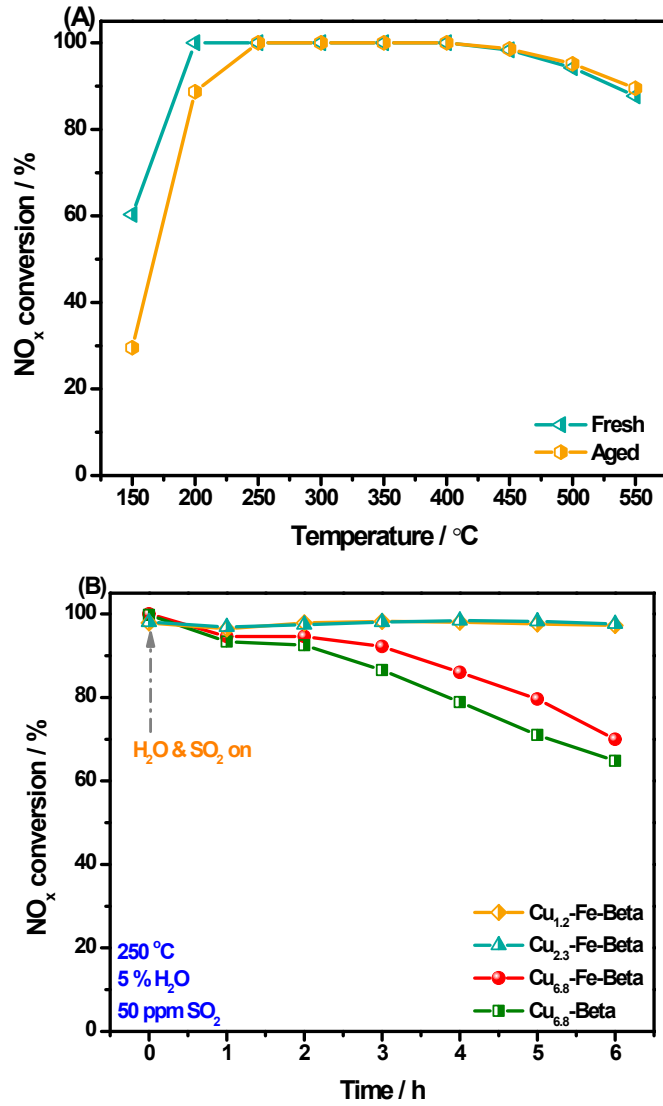

Fig. S6 NO conversion for Cu<sub>6,8</sub>-Fe-Beta after hydrothermal treatment as a function of temperature (A) and the influences of H<sub>2</sub>O and SO<sub>2</sub> on SCR activity at 250 °C (B). Conditions: (A) 500 ppm NO, 500 ppm NH<sub>3</sub>, 10% O<sub>2</sub>, 10% CO<sub>2</sub>, 5% H<sub>2</sub>O and N<sub>2</sub> balance, GHSV = 80,000 h<sup>-1</sup>; (B) 500 ppm NO, 500 ppm NH<sub>3</sub>, 10% O<sub>2</sub>, 5% H<sub>2</sub>O, 50 ppm SO<sub>2</sub> and N<sub>2</sub> balance, GHSV = 80,000 h<sup>-1</sup>.
